# Supplementary material for: Representative Residential Property Model—Soft Computing Solution
Source: MDPI journal article supplement (doi:10.3390/ijerph192215114), 2022-11-16
Supplement: s1 [file s1]

**Table S1.** RST.Attr. groupings of homogeneous property attributes sets within a selected homogeneous area. Source: own elaboration

[illegible]

[illegible]

[illegible]

[illegible]

|              |     |  |  |  |  |  |  |  |  |  |  |  |  |  |  |  |  |  |  |  |  |  |  |  |
|--------------|-----|--|--|--|--|--|--|--|--|--|--|--|--|--|--|--|--|--|--|--|--|--|--|--|
| RST.Attr.130 | 298 |  |  |  |  |  |  |  |  |  |  |  |  |  |  |  |  |  |  |  |  |  |  |  |
| RST.Attr.131 | 372 |  |  |  |  |  |  |  |  |  |  |  |  |  |  |  |  |  |  |  |  |  |  |  |
| RST.Attr.132 | 294 |  |  |  |  |  |  |  |  |  |  |  |  |  |  |  |  |  |  |  |  |  |  |  |
| RST.Attr.133 | 285 |  |  |  |  |  |  |  |  |  |  |  |  |  |  |  |  |  |  |  |  |  |  |  |
| RST.Attr.134 | 277 |  |  |  |  |  |  |  |  |  |  |  |  |  |  |  |  |  |  |  |  |  |  |  |
| RST.Attr.135 | 272 |  |  |  |  |  |  |  |  |  |  |  |  |  |  |  |  |  |  |  |  |  |  |  |
| RST.Attr.136 | 253 |  |  |  |  |  |  |  |  |  |  |  |  |  |  |  |  |  |  |  |  |  |  |  |
| RST.Attr.137 | 244 |  |  |  |  |  |  |  |  |  |  |  |  |  |  |  |  |  |  |  |  |  |  |  |
| RST.Attr.138 | 204 |  |  |  |  |  |  |  |  |  |  |  |  |  |  |  |  |  |  |  |  |  |  |  |
| RST.Attr.139 | 286 |  |  |  |  |  |  |  |  |  |  |  |  |  |  |  |  |  |  |  |  |  |  |  |
| RST.Attr.140 | 599 |  |  |  |  |  |  |  |  |  |  |  |  |  |  |  |  |  |  |  |  |  |  |  |

\* No. of homogeneous group (property attributes set).



[illegible]

[illegible]



[illegible]

[illegible]

|               |     |     |     |     |     |     |  |  |  |  |          |          |
|---------------|-----|-----|-----|-----|-----|-----|--|--|--|--|----------|----------|
| RST.Price.162 | 398 | 495 | 570 | 495 | 404 |     |  |  |  |  | 6727,27  | 6739,13  |
| RST.Price.163 | 555 | 324 |     |     |     |     |  |  |  |  | 6774,19  | 6785,71  |
| RST.Price.164 | 572 | 334 |     |     |     |     |  |  |  |  | 6800,00  | 6808,51  |
| RST.Price.165 | 380 | 214 | 377 | 286 | 286 | 336 |  |  |  |  | 6830,51  | 6849,06  |
| RST.Price.166 | 493 | 349 |     |     |     |     |  |  |  |  | 6862,75  | 6862,75  |
| RST.Price.167 | 97  | 280 | 530 | 97  | 588 |     |  |  |  |  | 6891,57  | 6923,08  |
| RST.Price.168 | 248 | 320 | 356 |     |     |     |  |  |  |  | 6944,44  | 6949,15  |
| RST.Price.169 | 532 | 411 | 490 | 583 |     |     |  |  |  |  | 6964,29  | 6975,31  |
| RST.Price.170 | 546 | 558 | 584 |     |     |     |  |  |  |  | 7000,00  | 7000,00  |
| RST.Price.171 | 552 | 244 | 436 |     |     |     |  |  |  |  | 7010,64  | 7031,25  |
| RST.Price.172 | 484 | 483 |     |     |     |     |  |  |  |  | 7078,95  | 7078,95  |
| RST.Price.173 | 317 | 298 |     |     |     |     |  |  |  |  | 7083,33  | 7086,96  |
| RST.Price.174 | 405 | 316 |     |     |     |     |  |  |  |  | 7111,11  | 7115,39  |
| RST.Price.175 | 542 | 322 | 323 |     |     |     |  |  |  |  | 7142,86  | 7142,86  |
| RST.Price.176 | 350 | 163 |     |     |     |     |  |  |  |  | 7153,85  | 7156,25  |
| RST.Price.177 | 171 | 170 | 600 |     |     |     |  |  |  |  | 7166,67  | 7187,50  |
| RST.Price.178 | 508 | 549 | 592 |     |     |     |  |  |  |  | 7279,07  | 7312,50  |
| RST.Price.179 | 174 | 293 | 536 | 152 | 410 |     |  |  |  |  | 7348,84  | 7368,42  |
| RST.Price.180 | 571 | 245 | 329 | 579 |     |     |  |  |  |  | 7405,71  | 7424,24  |
| RST.Price.181 | 301 | 300 |     |     |     |     |  |  |  |  | 7452,38  | 7452,38  |
| RST.Price.182 | 211 | 121 | 344 | 575 |     |     |  |  |  |  | 7500,00  | 7500,00  |
| RST.Price.183 | 599 | 247 | 321 |     |     |     |  |  |  |  | 7532,47  | 7567,57  |
| RST.Price.184 | 250 | 252 | 499 |     |     |     |  |  |  |  | 7653,85  | 7678,16  |
| RST.Price.185 | 369 | 149 | 164 | 365 |     |     |  |  |  |  | 7758,62  | 7812,50  |
| RST.Price.186 | 589 | 409 | 501 |     |     |     |  |  |  |  | 7904,76  | 7975,00  |
| RST.Price.187 | 581 | 474 |     |     |     |     |  |  |  |  | 8026,32  | 8058,82  |
| RST.Price.188 | 332 | 294 | 503 | 281 |     |     |  |  |  |  | 8181,82  | 8255,81  |
| RST.Price.189 | 227 | 427 | 505 | 151 | 450 |     |  |  |  |  | 8360,00  | 8560,61  |
| RST.Price.190 | 573 | 517 | 577 | 448 | 573 | 580 |  |  |  |  | 8680,85  | 9074,07  |
| RST.Price.191 | 176 | 215 | 283 |     |     |     |  |  |  |  | 9285,71  | 9433,96  |
| RST.Price.192 | 538 | 218 |     |     |     |     |  |  |  |  | 9588,52  | 9610,39  |
| RST.Price.193 | 504 | 125 |     |     |     |     |  |  |  |  | 9800,00  | 9861,11  |
| RST.Price.194 | 284 | 346 | 529 |     |     |     |  |  |  |  | 10370,37 | 10760,87 |

|                      |     |     |     |     |     |  |  |  |  |  |          |          |
|----------------------|-----|-----|-----|-----|-----|--|--|--|--|--|----------|----------|
| <b>RST.Price.195</b> | 225 | 226 | 282 | 586 | 287 |  |  |  |  |  | 11111,11 | 11666,67 |
| <b>RST.Price.196</b> | 169 | 288 | 591 | 587 | 330 |  |  |  |  |  | 12234,04 | 14634,15 |
| <b>RST.Price.197</b> | 219 | 223 |     |     |     |  |  |  |  |  | 17948,72 | 19754,72 |
| <b>RST.Price.198</b> | 126 | 127 | 219 |     |     |  |  |  |  |  | 19754,72 | 20561,22 |
| <b>RST.Price.199</b> | 224 | 221 |     |     |     |  |  |  |  |  | 23333,33 | 25536,59 |
| <b>RST.Price.200</b> | 220 |     |     |     |     |  |  |  |  |  | 30794,12 | 30794,12 |

\* No. of homogeneous group (property transaction prices).

Table S3. Matching RST.Attr. groupings of homogeneous property attributes with the RST.Price. homogeneous price groupings within a selected homogeneous area. Source: own elaboration

[illegible]

[illegible]

[illegible]

[illegible]



[illegible]

|               |               |               |               |               |              |              |  |  |  |  |          |          |
|---------------|---------------|---------------|---------------|---------------|--------------|--------------|--|--|--|--|----------|----------|
| RST.Price.173 | RST.Attr.28.  | RST.Attr.130. |               |               |              |              |  |  |  |  | 7083,33  | 7086,96  |
| RST.Price.174 | RST.Attr.12.  | RST.Attr.128. |               |               |              |              |  |  |  |  | 7111,11  | 7115,39  |
| RST.Price.175 | RST.Attr.103. | RST.Attr.52.  | RST.Attr.52.  |               |              |              |  |  |  |  | 7142,86  | 7142,86  |
| RST.Price.176 | RST.Attr.7.   | RST.Attr.87.  |               |               |              |              |  |  |  |  | 7153,85  | 7156,25  |
| RST.Price.177 | RST.Attr.1.   | RST.Attr.1.   | RST.Attr.21.  |               |              |              |  |  |  |  | 7166,67  | 7187,50  |
| RST.Price.178 | RST.Attr.61.  | RST.Attr.89.  | RST.Attr.83.  |               |              |              |  |  |  |  | 7279,07  | 7312,50  |
| RST.Price.179 | RST.Attr.18.  | RST.Attr.69.  | RST.Attr.4.   | RST.Attr.12.  | RST.Attr.93. |              |  |  |  |  | 7348,84  | 7368,42  |
| RST.Price.180 | RST.Attr.54.  | RST.Attr.61.  | RST.Attr.28.  | RST.Attr.13.  |              |              |  |  |  |  | 7405,71  | 7424,24  |
| RST.Price.181 | RST.Attr.53.  | RST.Attr.53.  |               |               |              |              |  |  |  |  | 7452,38  | 7452,38  |
| RST.Price.182 | RST.Attr.7.   | RST.Attr.9.   | RST.Attr.47.  | RST.Attr.10.  |              |              |  |  |  |  | 7500,00  | 7500,00  |
| RST.Price.183 | RST.Attr.140. | RST.Attr.9.   | RST.Attr.9.   |               |              |              |  |  |  |  | 7532,47  | 7567,57  |
| RST.Price.184 | RST.Attr.12.  | RST.Attr.34.  | RST.Attr.46.  |               |              |              |  |  |  |  | 7653,85  | 7678,16  |
| RST.Price.185 | RST.Attr.27.  | RST.Attr.45.  | RST.Attr.80.  | RST.Attr.125. |              |              |  |  |  |  | 7758,62  | 7812,50  |
| RST.Price.186 | RST.Attr.92.  | RST.Attr.12.  | RST.Attr.16.  |               |              |              |  |  |  |  | 7904,76  | 7975,00  |
| RST.Price.187 | RST.Attr.77.  | RST.Attr.75.  |               |               |              |              |  |  |  |  | 8026,32  | 8058,82  |
| RST.Price.188 | RST.Attr.15.  | RST.Attr.132. | RST.Attr.89.  | RST.Attr.16.  |              |              |  |  |  |  | 8181,82  | 8255,81  |
| RST.Price.189 | RST.Attr.31.  | RST.Attr.71.  | RST.Attr.46.  | RST.Attr.12.  | RST.Attr.67. |              |  |  |  |  | 8360,00  | 8560,61  |
| RST.Price.190 | RST.Attr.4.   | RST.Attr.39.  | RST.Attr.4.   | RST.Attr.39.  | RST.Attr.4.  | RST.Attr.13. |  |  |  |  | 8680,85  | 9074,07  |
| RST.Price.191 | RST.Attr.27.  | RST.Attr.45.  | RST.Attr.39.  |               |              |              |  |  |  |  | 9285,71  | 9433,96  |
| RST.Price.192 | RST.Attr.3.   | RST.Attr.106. |               |               |              |              |  |  |  |  | 9588,52  | 9610,39  |
| RST.Price.193 | RST.Attr.46.  | RST.Attr.61.  |               |               |              |              |  |  |  |  | 9800,00  | 9861,11  |
| RST.Price.194 | RST.Attr.46.  | RST.Attr.16.  | RST.Attr.101. |               |              |              |  |  |  |  | 10370,37 | 10760,87 |
| RST.Price.195 | RST.Attr.23.  | RST.Attr.23.  | RST.Attr.39.  | RST.Attr.36.  | RST.Attr.20. |              |  |  |  |  | 11111,11 | 11666,67 |
| RST.Price.196 | RST.Attr.42.  | RST.Attr.12.  | RST.Attr.50.  | RST.Attr.33.  | RST.Attr.82. |              |  |  |  |  | 12234,04 | 14634,15 |
| RST.Price.197 | RST.Attr.50.  | RST.Attr.44.  | RST.Attr.62.  | RST.Attr.62.  | RST.Attr.50. |              |  |  |  |  | 17948,72 | 20561,22 |
| RST.Price.198 | RST.Attr.62.  | RST.Attr.62.  | RST.Attr.50.  |               |              |              |  |  |  |  | 19754,72 | 20561,22 |
| RST.Price.199 | RST.Attr.35.  | RST.Attr.76.  |               |               |              |              |  |  |  |  | 23333,33 | 25536,59 |
| RST.Price.200 | RST.Attr.67.  |               |               |               |              |              |  |  |  |  | 30794,12 | 30794,12 |

**Table S4.** SOM.Attr. groupings of homogeneous property attributes set within a selected homogeneous area. Source: own elaboration

[illegible]









**Table S7.** W.Attr. groupings of homogeneous property attributes sets within a selected homogeneous area. Source: own elaboration.

[illegible]

\* No. of homogeneous group (property attributes set).



**Table S8.** W.Price. groupings of homogeneous prices of property transactions within a selected homogeneous area. Source: own elaboration.

| Price, №*  |     | TRANSACTION NUMBER |     |     |     |     |     |     |     |     |     |     |     |     |     |     |     |     |     |     |     |          |          |          |          |          |     |         |          |          |     |     |     |     |         |         |     |     |     |     |     |     |     |     |         |         |     |     |     |     |     |     |     |         |         |     |     |     |     |         |         | TRANSACTION PRICE [PLN] |         |         |         |     |         |         |     |     |     |     |     |         |         |     |     |     |     |     |     |     |     |     |     |     |         |         |
|------------|-----|--------------------|-----|-----|-----|-----|-----|-----|-----|-----|-----|-----|-----|-----|-----|-----|-----|-----|-----|-----|-----|----------|----------|----------|----------|----------|-----|---------|----------|----------|-----|-----|-----|-----|---------|---------|-----|-----|-----|-----|-----|-----|-----|-----|---------|---------|-----|-----|-----|-----|-----|-----|-----|---------|---------|-----|-----|-----|-----|---------|---------|-------------------------|---------|---------|---------|-----|---------|---------|-----|-----|-----|-----|-----|---------|---------|-----|-----|-----|-----|-----|-----|-----|-----|-----|-----|-----|---------|---------|
|            |     |                    |     |     |     |     |     |     |     |     |     |     |     |     |     |     |     |     |     |     |     |          |          |          |          |          |     |         |          |          |     |     |     |     |         |         |     |     |     |     |     |     |     |     |         |         |     |     |     |     |     |     |     |         |         |     |     |     |     |         |         | MIN                     | MAX     |         |         |     |         |         |     |     |     |     |     |         |         |     |     |     |     |     |     |     |     |     |     |     |         |         |
| W.Price.1  | 113 | 189                | 444 |     |     |     |     |     |     |     |     |     |     |     |     |     |     |     |     |     |     |          |          |          |          |          |     |         |          |          |     |     |     |     |         |         |     |     |     |     |     |     |     |     |         |         |     |     |     |     |     |     |     |         |         |     |     |     |     |         | 327,87  | 1685,39                 |         |         |         |     |         |         |     |     |     |     |     |         |         |     |     |     |     |     |     |     |     |     |     |     |         |         |
| W.Price.2  | 88  | 118                | 120 | 124 | 192 | 200 | 201 | 229 | 230 | 236 | 242 | 254 | 255 | 273 | 274 | 437 | 482 | 522 | 596 | 597 |     |          |          |          |          |          |     |         |          |          |     |     |     |     |         |         |     |     |     |     |     |     |     |     |         |         |     |     |     |     |     |     |     |         |         |     |     |     |     | 2500,00 | 3268,87 |                         |         |         |         |     |         |         |     |     |     |     |     |         |         |     |     |     |     |     |     |     |     |     |     |     |         |         |
| W.Price.3  | 0   | 1                  | 7   | 8   | 22  | 27  | 35  | 46  | 48  | 55  | 56  | 64  | 67  | 75  | 83  | 84  | 85  | 90  | 93  | 98  | 99  | 103      | 128      | 129      | 138      | 144      | 153 | 155     | 156      | 178      | 182 | 184 | 187 | 188 | 190     | 196     | 197 | 198 | 205 | 208 | 237 | 240 | 260 | 262 | 265     | 266     | 268 | 269 | 271 | 272 | 276 | 306 | 313 | 319     | 351     | 424 | 428 | 439 | 440 | 445     | 452     | 453                     | 458     | 469     | 489     | 502 | 513     | 520     | 594 | 601 | 602 | 607 | 610 | 3397,73 | 4069,77 |     |     |     |     |     |     |     |     |     |     |     |         |         |
| W.Price.4  | 3   | 4                  | 5   | 10  | 12  | 14  | 24  | 33  | 34  | 36  | 37  | 38  | 40  | 47  | 49  | 51  | 65  | 72  | 76  | 80  | 82  | 92       | 106      | 128      | 129      | 138      | 144 | 153     | 155      | 156      | 168 | 172 | 172 | 179 | 183     | 185     | 186 | 193 | 207 | 228 | 238 | 239 | 256 | 263 | 264     | 267     | 275 | 360 | 371 | 418 | 420 | 421 | 431 | 438     | 442     | 485 | 494 | 519 | 528 | 556     | 4085,71 | 4488,37                 |         |         |         |     |         |         |     |     |     |     |     |         |         |     |     |     |     |     |     |     |     |     |     |     |         |         |
| W.Price.5  | 9   | 15                 | 16  | 18  | 19  | 23  | 26  | 32  | 44  | 50  | 63  | 68  | 69  | 74  | 79  | 81  | 86  | 87  | 89  | 96  | 100 | 102      | 105      | 107      | 111      | 112      | 116 | 117     | 133      | 139      | 141 | 145 | 146 | 160 | 167     | 194     | 195 | 203 | 204 | 206 | 209 | 232 | 241 | 257 | 259     | 270     | 279 | 292 | 296 | 304 | 310 | 325 | 337 | 354     | 358     | 370 | 412 | 415 | 430 | 430     | 432     | 433                     | 435     | 451     | 455     | 464 | 465     | 466     | 467 | 470 | 473 | 477 | 491 | 506     | 509     | 510 | 515 | 524 | 525 | 535 | 545 | 550 | 553 | 593 | 604 | 609 | 4510,64 | 4943,46 |
| W.Price.6  | 2   | 7                  | 11  | 13  | 21  | 28  | 30  | 31  | 43  | 45  | 53  | 54  | 61  | 70  | 71  | 91  | 108 | 134 | 135 | 136 | 147 | 162      | 165      | 180      | 181      | 191      | 199 | 210     | 222      | 261      | 314 | 315 | 343 | 345 | 375     | 379     | 401 | 425 | 434 | 441 | 446 | 447 | 454 | 463 | 471     | 472     | 478 | 481 | 486 | 488 | 514 | 521 | 527 | 537     | 541     | 566 | 567 | 582 | 605 | 608     | 4546,36 | 4926,30                 |         |         |         |     |         |         |     |     |     |     |     |         |         |     |     |     |     |     |     |     |     |     |     |     |         |         |
| W.Price.7  | 20  | 29                 | 39  | 52  | 57  | 60  | 77  | 78  | 94  | 95  | 101 | 104 | 115 | 119 | 123 | 131 | 132 | 150 | 166 | 202 | 216 | 233      | 243      | 249      | 260      | 291      | 299 | 302     | 309      | 311      | 318 | 326 | 327 | 330 | 342     | 347     | 352 | 353 | 363 | 364 | 368 | 372 | 374 | 386 | 390     | 400     | 414 | 417 | 423 | 443 | 462 | 468 | 476 | 492     | 539     | 544 | 547 | 554 | 560 | 561     | 564     | 565                     | 568     | 595     | 597     | 603 | 4733,33 | 5233,81 |     |     |     |     |     |         |         |     |     |     |     |     |     |     |     |     |     |     |         |         |
| W.Price.8  | 6   | 25                 | 62  | 66  | 154 | 157 | 158 | 168 | 212 | 231 | 258 | 277 | 288 | 289 | 295 | 312 | 331 | 340 | 359 | 361 | 373 | 378      | 381      | 384      | 392      | 402      | 422 | 445     | 449      | 457      | 459 | 461 | 479 | 498 | 512     | 516     | 523 | 533 | 548 | 551 | 557 | 563 | 574 | 606 | 4740,51 | 5000,00 |     |     |     |     |     |     |     |         |         |     |     |     |     |         |         |                         |         |         |         |     |         |         |     |     |     |     |     |         |         |     |     |     |     |     |     |     |     |     |     |     |         |         |
| W.Price.9  | 17  | 41                 | 42  | 58  | 59  | 73  | 114 | 122 | 130 | 138 | 175 | 177 | 212 | 213 | 246 | 251 | 285 | 303 | 305 | 307 | 308 | 328      | 333      | 335      | 341      | 348      | 355 | 357     | 364      | 383      | 387 | 388 | 399 | 394 | 396     | 398     | 399 | 403 | 406 | 407 | 413 | 416 | 426 | 456 | 460     | 475     | 480 | 496 | 497 | 500 | 507 | 518 | 526 | 540     | 543     | 562 | 569 | 576 | 578 | 585     | 590     | 598                     | 603     | 4746,51 | 4845,46 |     |         |         |     |     |     |     |     |         |         |     |     |     |     |     |     |     |     |     |     |     |         |         |
| W.Price.10 | 97  | 140                | 163 | 170 | 171 | 173 | 214 | 234 | 235 | 244 | 248 | 255 | 280 | 286 | 297 | 298 | 316 | 317 | 320 | 322 | 323 | 324      | 334      | 336      | 338      | 349      | 350 | 356     | 367      | 376      | 377 | 380 | 382 | 385 | 385     | 398     | 404 | 405 | 411 | 429 | 436 | 483 | 484 | 487 | 490     | 493     | 495 | 530 | 532 | 534 | 542 | 546 | 552 | 555     | 558     | 559 | 570 | 572 | 583 | 584     | 588     | 600                     | 4756,00 | 5187,50 |         |     |         |         |     |     |     |     |     |         |         |     |     |     |     |     |     |     |     |     |     |     |         |         |
| W.Price.11 | 121 | 149                | 152 | 164 | 174 | 211 | 245 | 247 | 250 | 252 | 293 | 300 | 301 | 321 | 329 | 344 | 365 | 369 | 409 | 410 | 474 | 499      | 501      | 508      | 536      | 549      | 571 | 575     | 579      | 581      | 588 | 592 | 599 |     |         |         |     |     |     |     |     |     |     |     |         |         |     |     |     |     |     |     |     | 7279,07 | 8058,82 |     |     |     |     |         |         |                         |         |         |         |     |         |         |     |     |     |     |     |         |         |     |     |     |     |     |     |     |     |     |     |     |         |         |
| W.Price.12 | 151 | 227                | 281 | 294 | 332 | 427 | 448 | 450 | 503 | 505 | 517 | 573 | 577 | 580 |     |     |     |     |     |     |     |          |          |          |          |          |     |         |          |          |     |     |     |     | 8181,82 | 9074,07 |     |     |     |     |     |     |     |     |         |         |     |     |     |     |     |     |     |         |         |     |     |     |     |         |         |                         |         |         |         |     |         |         |     |     |     |     |     |         |         |     |     |     |     |     |     |     |     |     |     |     |         |         |
| W.Price.13 | 125 | 176                | 215 | 218 | 283 | 504 | 538 |     |     |     |     |     |     |     |     |     |     |     |     |     |     |          |          |          |          |          |     | 9285,71 | 9861,11  |          |     |     |     |     |         |         |     |     |     |     |     |     |     |     |         |         |     |     |     |     |     |     |     |         |         |     |     |     |     |         |         |                         |         |         |         |     |         |         |     |     |     |     |     |         |         |     |     |     |     |     |     |     |     |     |     |     |         |         |
| W.Price.14 | 225 | 226                | 282 | 284 | 287 | 346 | 529 | 586 |     |     |     |     |     |     |     |     |     |     |     |     |     |          |          |          |          |          |     |         | 10370,37 | 11666,67 |     |     |     |     |         |         |     |     |     |     |     |     |     |     |         |         |     |     |     |     |     |     |     |         |         |     |     |     |     |         |         |                         |         |         |         |     |         |         |     |     |     |     |     |         |         |     |     |     |     |     |     |     |     |     |     |     |         |         |
| W.Price.15 | 169 | 288                | 587 | 591 |     |     |     |     |     |     |     |     |     |     |     |     |     |     |     |     |     |          |          |          | 12234,04 | 13461,54 |     |         |          |          |     |     |     |     |         |         |     |     |     |     |     |     |     |     |         |         |     |     |     |     |     |     |     |         |         |     |     |     |     |         |         |                         |         |         |         |     |         |         |     |     |     |     |     |         |         |     |     |     |     |     |     |     |     |     |     |     |         |         |
| W.Price.16 | 330 |                    |     |     |     |     |     |     |     |     |     |     |     |     |     |     |     |     |     |     |     | 14634,15 | 14634,15 |          |          |          |     |         |          |          |     |     |     |     |         |         |     |     |     |     |     |     |     |     |         |         |     |     |     |     |     |     |     |         |         |     |     |     |     |         |         |                         |         |         |         |     |         |         |     |     |     |     |     |         |         |     |     |     |     |     |     |     |     |     |     |     |         |         |
| W.Price.17 | 223 |                    |     |     |     |     |     |     |     |     |     |     |     |     |     |     |     |     |     |     |     | 17948,72 | 17948,72 |          |          |          |     |         |          |          |     |     |     |     |         |         |     |     |     |     |     |     |     |     |         |         |     |     |     |     |     |     |     |         |         |     |     |     |     |         |         |                         |         |         |         |     |         |         |     |     |     |     |     |         |         |     |     |     |     |     |     |     |     |     |     |     |         |         |
| W.Price.18 | 126 | 127                | 219 |     |     |     |     |     |     |     |     |     |     |     |     |     |     |     |     |     |     |          |          | 19754,72 | 20561,22 |          |     |         |          |          |     |     |     |     |         |         |     |     |     |     |     |     |     |     |         |         |     |     |     |     |     |     |     |         |         |     |     |     |     |         |         |                         |         |         |         |     |         |         |     |     |     |     |     |         |         |     |     |     |     |     |     |     |     |     |     |     |         |         |
| W.Price.19 | 224 |                    |     |     |     |     |     |     |     |     |     |     |     |     |     |     |     |     |     |     |     | 23333,33 | 23333,33 |          |          |          |     |         |          |          |     |     |     |     |         |         |     |     |     |     |     |     |     |     |         |         |     |     |     |     |     |     |     |         |         |     |     |     |     |         |         |                         |         |         |         |     |         |         |     |     |     |     |     |         |         |     |     |     |     |     |     |     |     |     |     |     |         |         |
| W.Price.20 | 221 |                    |     |     |     |     |     |     |     |     |     |     |     |     |     |     |     |     |     |     |     | 25336,59 | 25336,59 |          |          |          |     |         |          |          |     |     |     |     |         |         |     |     |     |     |     |     |     |     |         |         |     |     |     |     |     |     |     |         |         |     |     |     |     |         |         |                         |         |         |         |     |         |         |     |     |     |     |     |         |         |     |     |     |     |     |     |     |     |     |     |     |         |         |
| W.Price.21 | 220 |                    |     |     |     |     |     |     |     |     |     |     |     |     |     |     |     |     |     |     |     | 30794,12 | 30794,12 |          |          |          |     |         |          |          |     |     |     |     |         |         |     |     |     |     |     |     |     |     |         |         |     |     |     |     |     |     |     |         |         |     |     |     |     |         |         |                         |         |         |         |     |         |         |     |     |     |     |     |         |         |     |     |     |     |     |     |     |     |     |     |     |         |         |

\* No. of homogeneous group (property transaction prices).
